# Supplementary material for: Applying UK real-world primary care data to predict asthma attacks in 3776 well-characterised children: a retrospective cohort study
Source: PubMed Central journal article supplement (PMC6056517; doi:10.1038/s41533-018-0095-5), 2018-07-23
Supplement: 41533_2018_95_MOESM1_ESM.pdf [file 41533_2018_95_MOESM1_ESM.pdf]

## Asthma read codes

| read_code | read_term                                     |
|-----------|-----------------------------------------------|
| 173A.     | Exercise induced asthma                       |
| 66YJ.     | Asthma annual review                          |
| 66YK.     | Asthma follow-up                              |
| 66YQ.     | Asthma monitoring by nurse                    |
| 66YR.     | Asthma monitoring by doctor                   |
| 8793.     | Asthma control step 0                         |
| 8794.     | Asthma control step 1                         |
| 8795.     | Asthma control step 2                         |
| 8796.     | Asthma control step 3                         |
| 8797.     | Asthma control step 4                         |
| 8798.     | Asthma control step 5                         |
| 8B3j.     | Asthma medication review                      |
| 9OJA.     | Asthma monitoring check done                  |
| H302.     | Wheezy bronchitis                             |
| H3120     | Recurrent wheezy bronchitis                   |
| H3120     | Chronic asthmatic bronchitis                  |
| H33..     | Asthma                                        |
| H330.     | Extrinsic (atopic) asthma                     |
| H3300     | Extrinsic asthma - no status                  |
| H3301     | Extrinsic asthma + status                     |
| H330z     | Extrinsic asthma NOS                          |
| H331.     | Intrinsic asthma                              |
| H3310     | Intrinsic asthma - no status                  |
| H3311     | Intrinsic asthma + status                     |
| H331z     | Intrinsic asthma NOS                          |
| H332.     | Mixed asthma                                  |
| H334.     | Brittle asthma                                |
| H335.     | Chronic asthma with fixed airflow obstruction |
| H33z.     | Asthma unspecified                            |
| H33z0     | Status asthmaticus NOS                        |
| H33z1     | Asthma attack                                 |
| H33z2     | Late-onset asthma                             |
| H33zz     | Asthma NOS                                    |
| Ua1AX     | Brittle asthma                                |
| X101t     | Childhood asthma                              |
| X101u     | Late onset asthma                             |
| X101u     | Late-onset asthma                             |
| X101x     | Allergic asthma                               |
| X101y     | Extrinsic asthma + attack                     |
| X101z     | Allergic asthma NEC                           |
| X1020     | Hay fever with asthma                         |
| X1020     | Pollen asthma                                 |
| X1021     | Allergic non-atopic asthma                    |
| X1022     | Intrinsic asthma + attack                     |
| X1024     | ASA with nasal polyps                         |

|       |                                               |
|-------|-----------------------------------------------|
| X102D | Status asthmaticus                            |
| XE0YQ | Extrinsic (atopic) asthma                     |
| XE0YR | Extrinsic asthma - no status                  |
| XE0YS | Extrinsic asthma + status                     |
| XE0YT | Intrinsic asthma                              |
| XE0YU | Intrinsic asthma + status                     |
| XE0YV | Status asthmaticus NOS                        |
| XE0YV | Severe asthma attack                          |
| XE0YW | Asthma attack                                 |
| XE0YX | Asthma NOS                                    |
| XE0YX | Allergic bronchitis NEC                       |
| XE0ZP | Extrinsic asthma - atopy (& ++                |
| XE0ZR | Asthma: [intrinsic] or [late++                |
| XE0ZT | Asthma: [NOS] or [attack]                     |
| XE2Nb | Asthma monitoring check done                  |
| XE2Nb | Asthma monitored                              |
| XM0s2 | Asthma attack NOS                             |
| Xa0IZ | Wheezy bronchitis                             |
| Xa1hD | Acute exacerbation of asthma                  |
| Xa9zf | Acute asthma                                  |
| Xaleq | Asthma annual review                          |
| Xaler | Asthma follow-up                              |
| XalfK | Asthma medication review                      |
| Xalu5 | Asthma monitoring by nurse                    |
| Xalu6 | Asthma monitoring by doctor                   |
| XaLPE | Nocturnal asthma                              |
| Xaa7B | Chronic asthma with fixed airflow obstruction |
| H333. | Acute exacerbation of asthma                  |

## Eosinophil read codes

| read_code | read_term                      |
|-----------|--------------------------------|
| 424..     | Full blood count - FBC         |
| 424Z.     | Full blood count NOS           |
| 42K..     | Eosinophil count               |
| 42K1.     | Eosinophil count normal        |
| 42K2.     | Eosinopenia                    |
| 42K3.     | Eosinophil count raised        |
| 42KZ.     | Eosinophil count NOS           |
| 42b9.     | Percentage eosinophils         |
| 4E32.     | Sputum: eosinophilia           |
| D403.     | Eosinophilia                   |
| D4030     | Hereditary eosinophilia        |
| D4031     | Idiopathic eosinophilia        |
| D4032     | Drug induced eosinophilia      |
| D4033     | Allergic eosinophilia          |
| D4034     | Secondary eosinophilia NOS     |
| D403z     | Eosinophilia NOS               |
| H583.     | Pulmonary eosinophilia         |
| H5831     | Tropical eosinophilia          |
| H583z     | Pulmonary eosinophilia NOS     |
| J08z5     | Oral mucosa eosinoph.granuloma |
| X00l1     | Eosinophil non-allergic rhinit |
| X102G     | Asthmatic pulm eosinophilia    |
| X102H     | Cryptogenic pulm eosinophilia  |
| X3009     | Eosinophilic oesophagitis      |
| X80VM     | Eosinophil                     |
| Xa0kb     | Tropical pulm eosinophilia     |
| XaCJj     | Percentage eosinophils         |

## COPD read codes

| read_code | read_term                      |
|-----------|--------------------------------|
| H3...     | Chronic obstructive pulm.dis.  |
| H3...     | Obstructive chronic bronchitis |
| H31..     | Chronic bronchitis             |
| H310.     | Simple chronic bronchitis      |
| H310.     | Chronic catarrhal bronchitis   |
| H3100     | Chronic catarrhal bronchitis   |
| H3101     | Smokers' cough                 |
| H310z     | Simple chronic bronchitis NOS  |
| H311.     | Mucopurulent chr.bronchitis    |
| H3110     | Purulent chronic bronchitis    |
| H3111     | Fetid chronic bronchitis       |
| H311z     | Mucopurulent chr.bronchit.NOS  |
| H312.     | Obstructive chronic bronchitis |
| H3120     | Chronic asthmatic bronchitis   |
| H3121     | Emphysematous bronchitis       |
| H3122     | Acute exacerbation of COAD     |
| H3123     | Bronchiolitis obliterans       |
| H312z     | Obstructive chr.bronchitis NOS |
| H313.     | Mixd simp+mucopur chron bronch |
| H31y.     | Other chronic bronchitis       |
| H31y0     | Chronic tracheitis             |
| H31y1     | Chronic tracheobronchitis      |
| H31yz     | Other chronic bronchitis NOS   |
| H31z.     | Chronic bronchitis NOS         |
| H32..     | Emphysema                      |
| H320.     | Chronic bullous emphysema      |
| H3200     | Segmental bullous emphysema    |
| H3201     | Zonal bullous emphysema        |
| H3202     | Giant bullous emphysema        |
| H3203     | Bullous emphysema + collapse   |
| H320z     | Chronic bullous emphysema NOS  |
| H321.     | Panlobular emphysema           |
| H322.     | Centrilobular emphysema        |
| H32y.     | Other emphysema                |
| H32y0     | Acute vesicular emphysema      |
| H32y1     | Atrophic (senile) emphysema    |
| H32y2     | MacLeod's unilateral emphysema |
| H32yz     | Other emphysema NOS            |
| H32z.     | Emphysema NOS                  |
| H36..     | Mild chron obstr pulm disease  |
| H37..     | Mod chron obstr pulm disease   |
| H38..     | Sev chron obstr pulm disease   |
| H39..     | Very severe COPD               |
| H3y..     | Chronic obstr.airway dis.OS    |
| H3y0.     | Chr obs pulm dis+ac I resp inf |

|       |                                |
|-------|--------------------------------|
| H3z.. | Chronic obstr.airway dis.NOS   |
| H4640 | Chronic chemical emphysema     |
| H4641 | Chemical obliter.bronchiolitis |
| H581. | Acute interstitial emphysema   |
| H582. | Compensatory emphysema         |
| Hyu30 | [X]Other emphysema             |
| Hyu31 | [X]O spcf chron obs pulmon dis |
| X101i | Chr obs pulm dis+ac exac,unspc |
| X101j | Occupational chr bronchitis    |
| X101k | Byssinosis grade 3             |
| X101l | Bronchiolitis obliterans       |
| X101m | Drug-induced bronchiolit oblit |
| X101n | Pulmonary emphysema            |
| X101o | Pulm emphysema, alpha-1 PI def |
| X101p | Toxic emphysema                |
| X101q | Congenital lobar emphysema     |
| X101r | Scar emphysema                 |
| X102z | Bronchiolitis oblit with UIP   |
| XE0YM | Purulent chronic bronchitis    |
| XE0YM | Fetid chronic bronchitis       |
| XE0YN | Bullous emphysema + collapse   |
| XE0YO | Atrophic (senile) emphysema    |
| XE0YP | Other emphysema NOS            |
| XE0ZN | Chronic: [bronchitis NOS] or++ |
| XM1Qc | Tension pneumatocele           |
| XaEIV | Mild chron obstr pulm disease  |
| XaEIW | Mod chron obstr pulm disease   |
| XaEiy | Sev chron obstr pulm disease   |
| XaIND | End stag chron obst airway dis |
| XaIQg | Interstit pulmonary emphysema  |
| XaN4a | Very severe COPD               |
| H3y1. | Chr obs pulm dis+ac exac,unspc |

## Rhinitis read codes

| read_code | read_term                       |
|-----------|---------------------------------|
| H120.     | Chronic rhinitis                |
| H1200     | Chronic simple rhinitis         |
| H1201     | Chronic catarrhal rhinitis      |
| H1202     | Chronic hypertrophic rhinitis   |
| H1203     | Chronic atrophic rhinitis       |
| H1204     | Chronic infective rhinitis      |
| H1205     | Chronic ulcerative rhinitis     |
| H1206     | Chronic membranous rhinitis     |
| H1207     | Chronic fibrinous rhinitis      |
| H120z     | Chronic rhinitis NOS            |
| H17..     | Allergic rhinitis               |
| H170.     | Allergic rhinitis - pollens     |
| H171.     | Allerg.rhinit.-other allergens  |
| H172.     | Allergic rhinitis-unsp allerg   |
| H18..     | Vasomotor rhinitis              |
| Hyu20     | [X]Oth seasonl allergc rhinitis |
| Hyu21     | [X]Other allergic rhinitis      |
| X00kv     | Rhinitis - acute                |
| X00IA     | Perennial rhinitis              |
| XE0Xx     | Chronic rhinitis                |
| XE0Xy     | Chronic catarrhal rhinitis      |
| XE0Y5     | Allergic rhinitis               |
| XE0Y6     | Allerg.rhinit.-other allergens  |
| XE0Y7     | Allergic rhinitis-unsp allerg   |
| XE2QI     | Allergic rhinitis - pollens     |
| H17z.     | Allergic rhinitis NOS           |

## Eczema read codes

| read_code | read_term                      |
|-----------|--------------------------------|
| 14F1.     | H/O: eczema                    |
| 26C4.     | Nipple eczema                  |
| 8HTu.     | Referral to eczema clinic      |
| A540.     | Eczema herpeticum - Kaposi's   |
| F4D30     | Eczematous eyelid dermatitis   |
| F5024     | Acute eczematoid otitis extern |
| G831.     | Varicose vein leg with eczema  |
| G832.     | Varicose vein leg+ulcer+eczema |
| M102.     | Pustular eczema                |
| M102.     | Infectious eczematoid dermatit |
| M102.     | Infected eczema                |
| M111.     | Atopic dermatitis/eczema       |
| M112.     | Infantile eczema               |
| M113.     | Flexural eczema                |
| M114.     | Allergic (intrinsic) eczema    |
| M119.     | Discoid eczema                 |
| M12..     | Contact dermatitis/other eczem |
| M12z1     | Eczema NOS                     |
| M12z2     | Infected eczema                |
| M12z3     | Hand eczema                    |
| M12z4     | Erythrodermic eczema           |
| Myu2.     | [X]Dermatitis and eczema       |
| Myu22     | [X]Exacerbation of eczema      |
| X00iT     | Eczema of external ear         |
| X40Fx     | Nipple eczema                  |
| X505L     | Hand eczema                    |
| X505j     | Discoid eczema                 |
| X506T     | Erythrodermic eczema           |
| XE16i     | Contact eczema - eyelids       |
| XE17A     | Acute eczematoid otitis extern |
| XE1An     | Seborrhoeic eczema             |
| XE1Ap     | Contact dermatitis/other eczem |
| XE1Av     | Eczema NOS                     |
| Xa0p8     | Eczematous eyelid dermatitis   |
| Xa9CV     | Contact eczema                 |
| XaINM     | [X]Exacerbation of eczema      |
| XaQfn     | Referral to eczema clinic      |
| XaY4o     | Infected eczema                |
| m111.     | Atopic dermatitis/eczema       |

## Rhinitis read codes

| read_code | read_term                                             |
|-----------|-------------------------------------------------------|
| H170.     | Allergic rhinitis - pollens<br>[X]Oth seasonl allergc |
| Hyu20     | rhinitis                                              |
| X00I8     | Hay fever - other allergen<br>Hay fever - unspec      |
| X00I9     | allergen                                              |
| X1020     | Hay fever with asthma                                 |
| X1020     | Pollen asthma                                         |
| XE2QI     | Allergic rhinitis - pollens                           |
| XE2QI     | Hay fever - pollens                                   |
| Xa0IX     | Pollinosis                                            |



## Chronic respiratory disease read codes

| read_code | read_term                      |
|-----------|--------------------------------|
| AD5..     | Sarcoidosis                    |
| H40..     | Coal workers' pneumoconiosis   |
| H41..     | Asbestosis                     |
| H410.     | Pleural plaque dis.-asbestosis |
| H41z.     | Asbestosis NOS                 |
| H42..     | Silica/silicate pneumoconiosis |
| H420.     | Talc pneumoconiosis            |
| H421.     | Simple silicosis               |
| H422.     | Complicated silicosis          |
| H423.     | Massive silicotic fibrosis     |
| H42z.     | Silica pneumoconiosis NOS      |
| H43..     | Pneumoconios.-other inorg.dust |
| H431.     | Bauxite fibrosis of lung       |
| H432.     | Berylliosis                    |
| H433.     | Graphite fibrosis of lung      |
| H434.     | Siderosis                      |
| H435.     | Stannosis                      |
| H43z.     | Pneumoconiosis-inorg.dust NOS  |
| H44..     | Pneumopathy-other dust inhal.  |
| H440.     | Byssinosis                     |
| H441.     | Cannabinosis                   |
| H44z.     | Pneumopathy-dust inhalat.NOS   |
| H45..     | Pneumoconiosis NOS             |
| H450.     | Pneumoconiosis associated/TB   |
| H46..     | Resp.disease - chemical fumes  |
| H460.     | Chemical bronchitis/pneumonit. |
| H460z     | Chemical bronch/pneumonit NOS  |
| H464.     | Chronic chemical resp.condit.  |
| H4641     | Chemical obliter.bronchiolitis |
| H4642     | Chemical pulmonary fibrosis    |
| H464z     | Chronic chem.resp.condit.NOS   |
| H46z.     | Chemical resp.conditions NOS   |
| H46zz     | Chemical resp.conditions NOS   |
| H48..     | Progressive massive fibrosis   |
| H4y..     | External agent lung dis.OS     |
| H4y1.     | Chronic pulm.radiation disease |
| H4y10     | Radiation pulmonary fibrosis   |
| H4y1z     | Chronic pulm.radiation dis.NOS |
| H4y2.     | Drg-induc interstit lung disor |
| H4y21     | Chr drg-indc interst lung diso |
| H4yy.     | Other ext.agent resp.condition |
| H4yz.     | External agent resp.condit.NOS |
| H4z..     | External agent lung dis.NOS    |
| H57y2     | Pulmonary sarcoidosis          |
| X101U     | Pleural plaque dis.-asbestosis |

|       |                                |
|-------|--------------------------------|
| X103X | Progressive massive fibrosis   |
| XE0YY | Lung disease due to ext.agents |
| Xa9Bw | Pneumoconioses                 |
| Xa9Bw | Occupational lung disease      |
| H4... | Lung disease due to ext.agents |
